# Supplementary material for: Electronic and photocatalytic properties of N/F co-doped anatase TiO2
Source: Royal Society of Chemistry journal article supplement (doi:10.1039/c7ra10546k), 2017-01-01
Supplement: c7ra10546k1.pdf [file c7ra10546k1.pdf]

# Supporting Information

## Electronic and photocatalytic properties of N/F co-doped anatase TiO<sub>2</sub>

Yafei Zhao<sup>a</sup>, Wei Wang<sup>a</sup>, Can Li<sup>b</sup> and Liang He<sup>\*a</sup>

<sup>a</sup>National Laboratory of Solid State Microstructures, School of Electronic Science and Engineering and Collaborative Innovation Center of Advanced Microstructures, Nanjing University, Nanjing 210093, China

<sup>b</sup>Center for Coordination Bond Engineering, College of Materials Science and Engineering, China Jiliang University, Hangzhou 310018, China

Corresponding Authors

\* L.H: [heliang@nju.edu.cn](mailto:heliang@nju.edu.cn)

### SUPPORTING INFORMATION

#### S1. All possible configurations

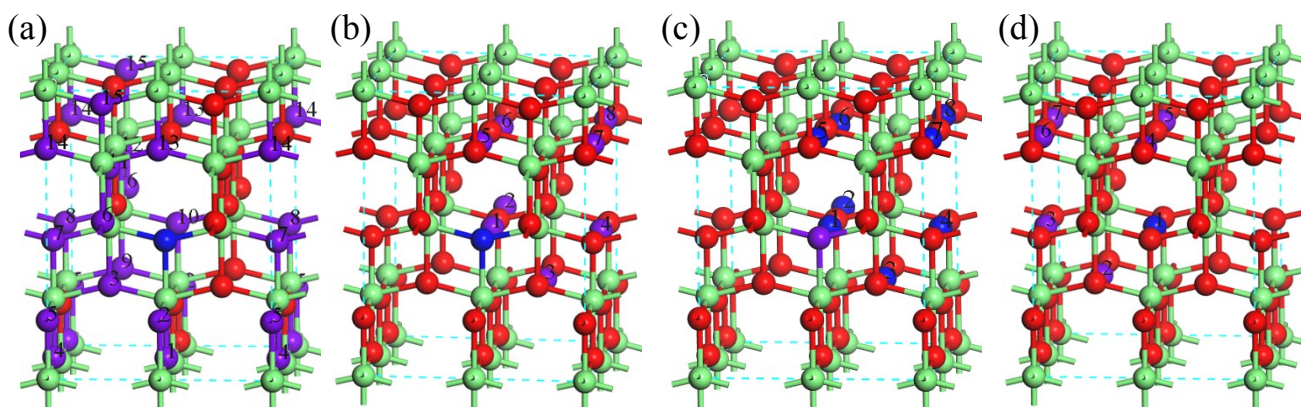

Figure S1. (Color online) The crystal structures of four different cases: (a) N<sub>s</sub>-F<sub>s</sub> co-doped TiO<sub>2</sub>, (b) N<sub>s</sub>-F<sub>i</sub> co-doped TiO<sub>2</sub>, (c) N<sub>i</sub>-F<sub>s</sub> co-doped TiO<sub>2</sub> and (d) N<sub>i</sub>-F<sub>i</sub> co-doped TiO<sub>2</sub>, where green, red, blue and purple balls are the Ti, O, N and F atoms, respectively. The number denotes the different substituted positions of N or F atoms.
